# Supplementary material for: Multi-tissue transcriptome analysis of two Begonia species reveals dynamic patterns of evolution in the chalcone synthase gene family
Source: PubMed Central journal article supplement (PMC8423730; doi:10.1038/s41598-021-96854-y), 2021-09-07
Supplement: 41598_2021_96854_MOESM1_ESM.pdf [file 41598_2021_96854_MOESM1_ESM.pdf]

# Multi-tissue transcriptome analysis of two *Begonia* species reveals dynamic patterns of evolution in the chalcone synthase gene family

Katie Emelianova<sup>1,2\*</sup>, Andrea Martínez Martínez<sup>1,3</sup>, Lucia Campos-Dominguez<sup>1,3</sup>, Catherine Kidner<sup>1,3</sup>

<sup>1</sup> Royal Botanic Gardens Edinburgh, 20a Inverleith Row, Edinburgh, EH3 5LR UK

<sup>2</sup> Dementia Research Institute at the University of Edinburgh, Edinburgh, UK

<sup>3</sup> School of Biological Sciences, University of Edinburgh, King's Buildings, Mayfield Rd, Edinburgh, EH9 3JU UK

\*Corresponding author

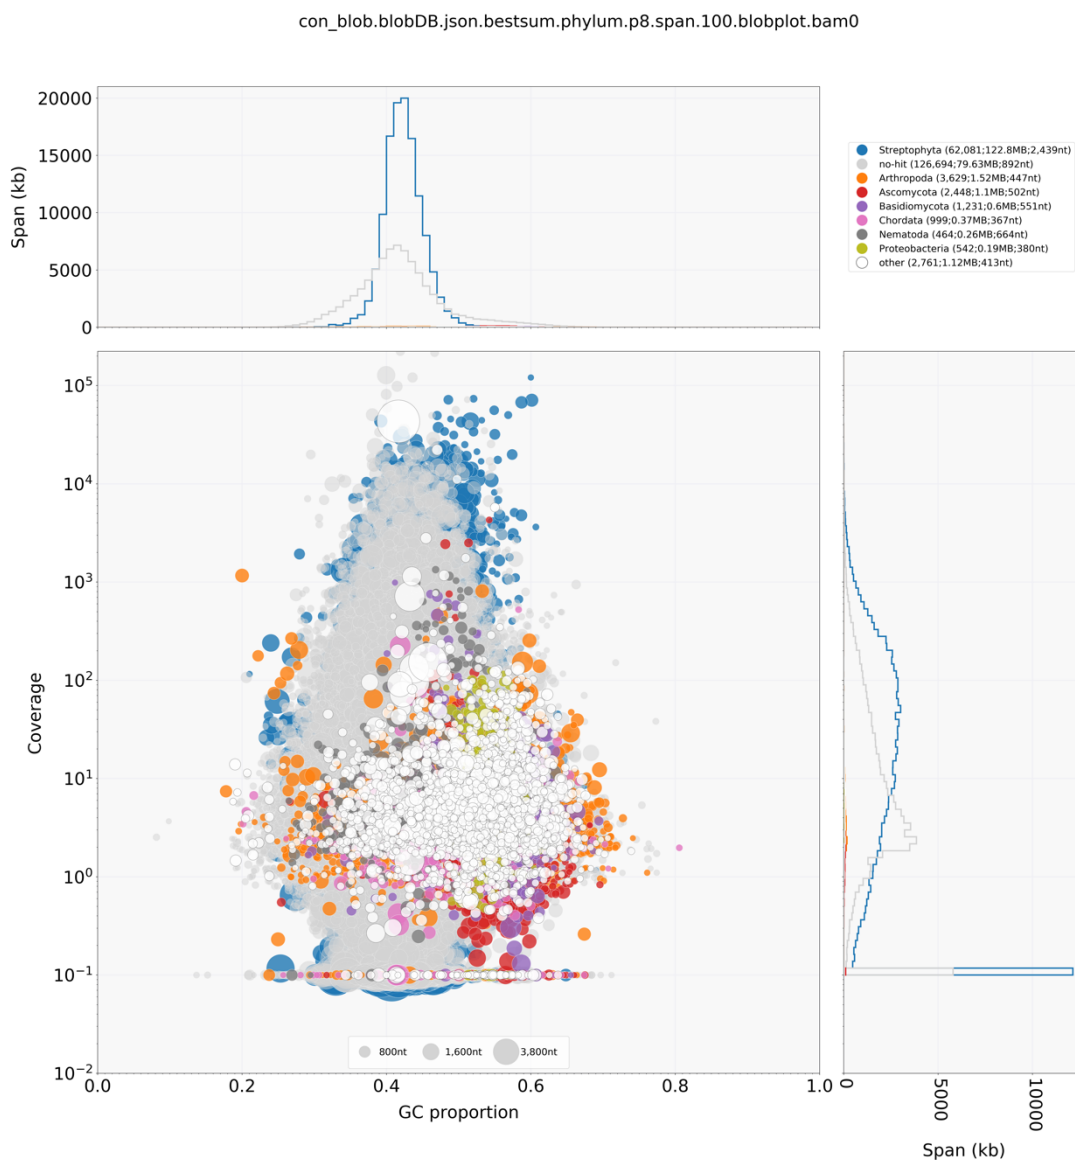

Supplementary figure 1. *B. conchifolia* BlobPlot showing taxonomic origin of transcripts

ple\_blob.blobDB.json.bestsum.phylum.p8.span.100.blobplot.bam0

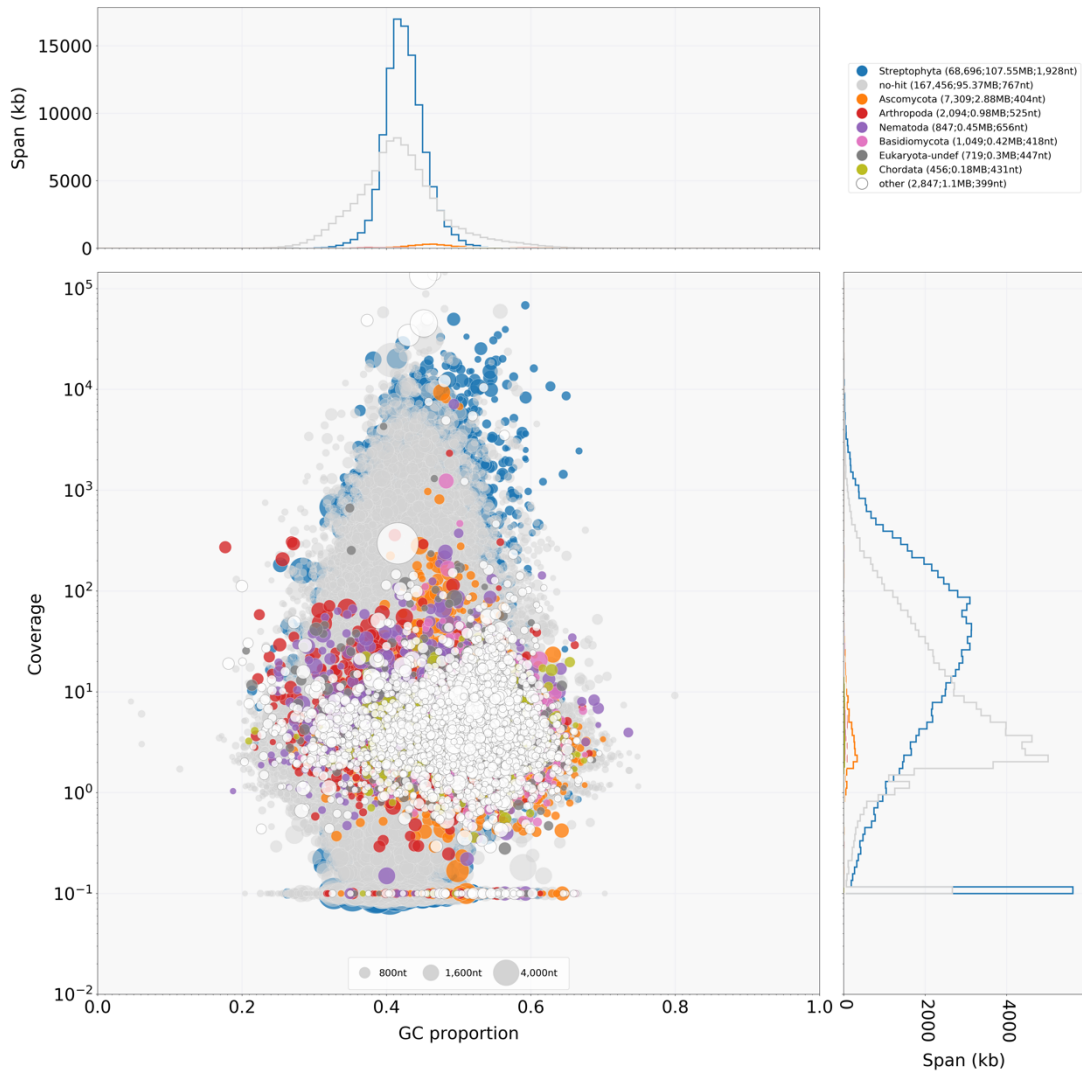

Supplementary figure 2. *B. plebeja* BlobPlot showing taxonomic origin of transcripts.

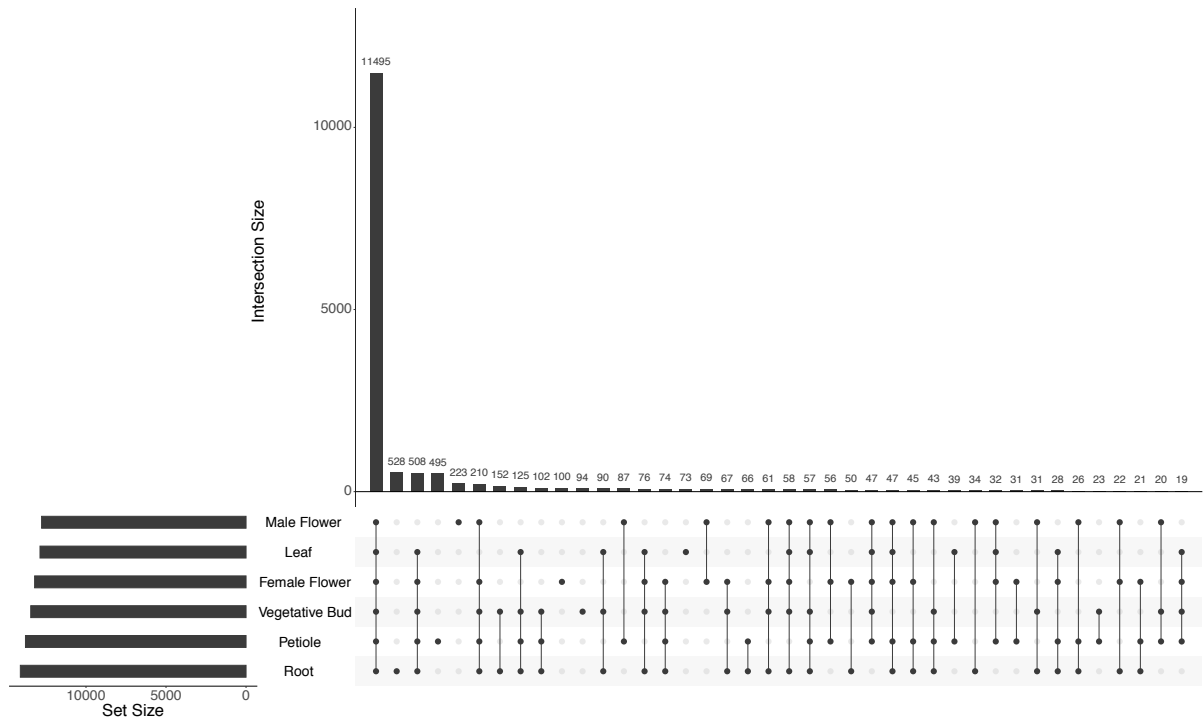

Supplementary figure 3. UpSet plot of number of transcripts shared between each tissue in *B. conchifolia*. Transcript presence/absence threshold was set at 1 FPKM.

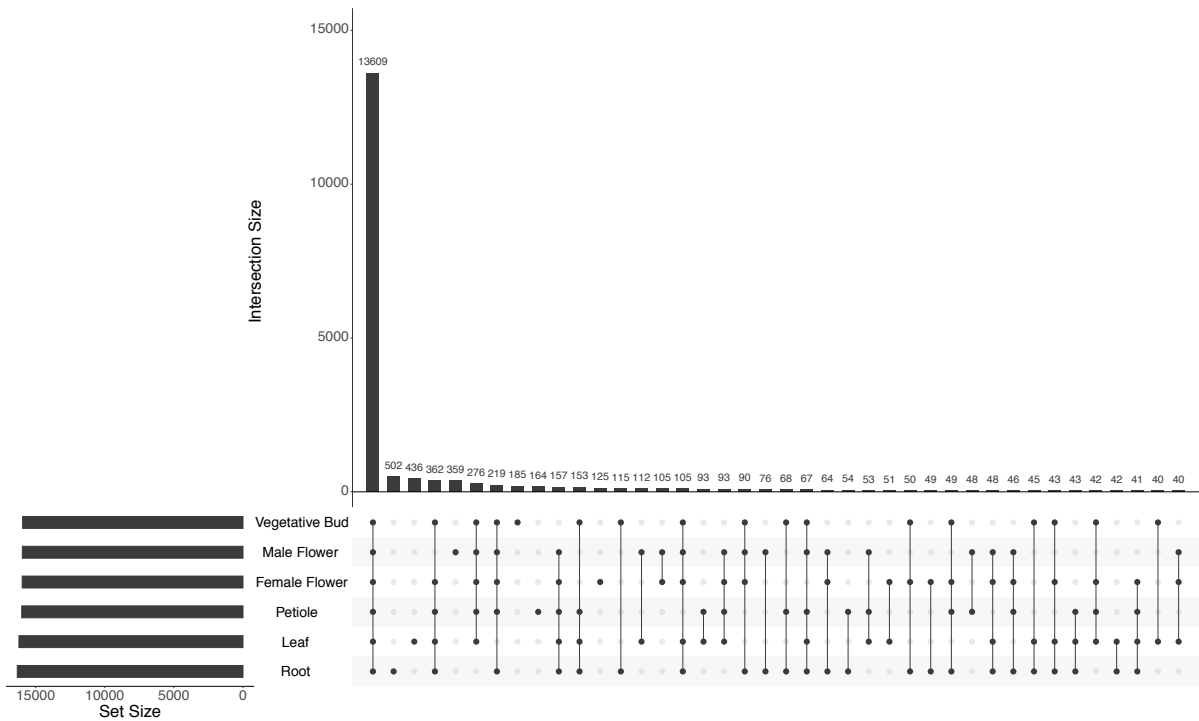

Supplementary figure 4. UpSet plot of number of transcripts shared between each tissue in *B. plebeja*. Transcript presence/absence threshold was set at 1 FPKM.

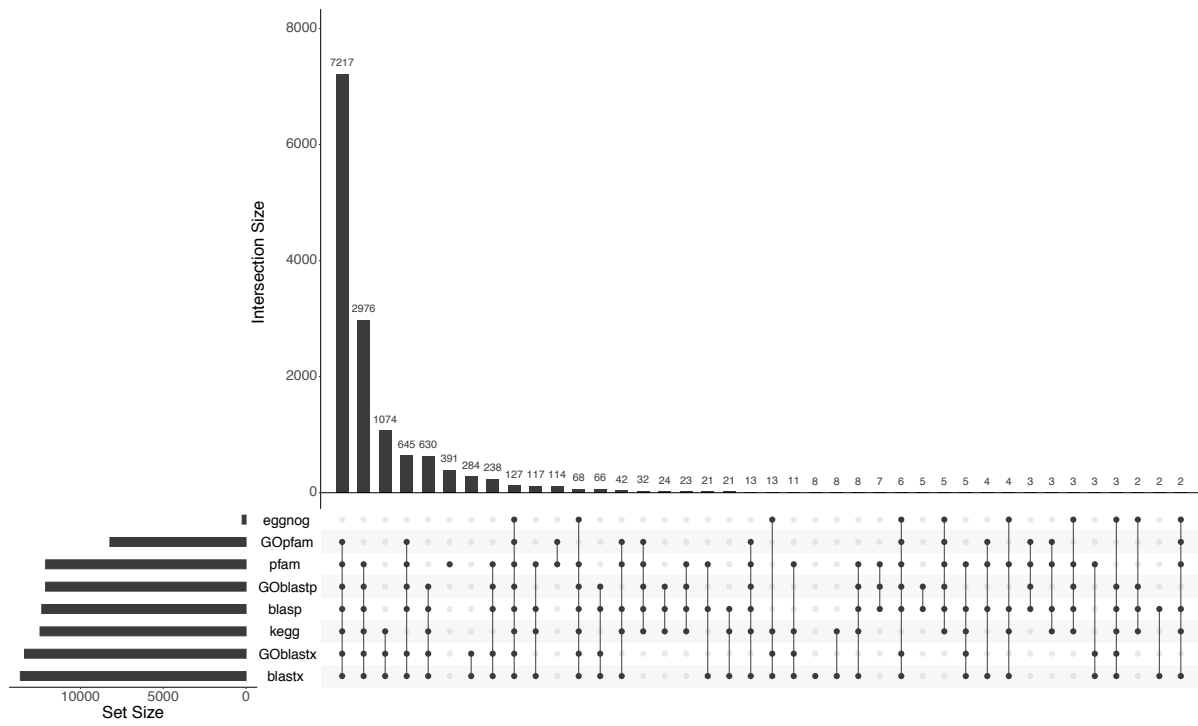

Supplementary figure 5. UpSet plot of sources of annotation of *B. conchifolia* unigenes.

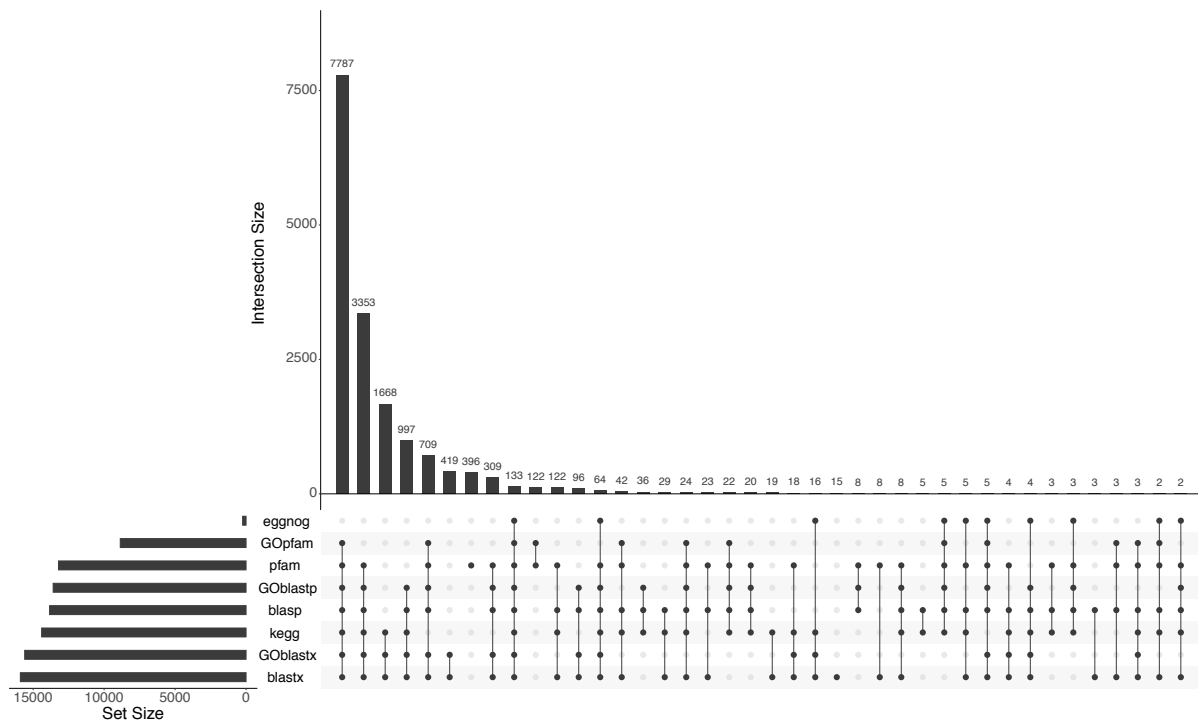

Supplementary figure 6. UpSet plot of sources of annotation of *B. plebeja* unigenes.

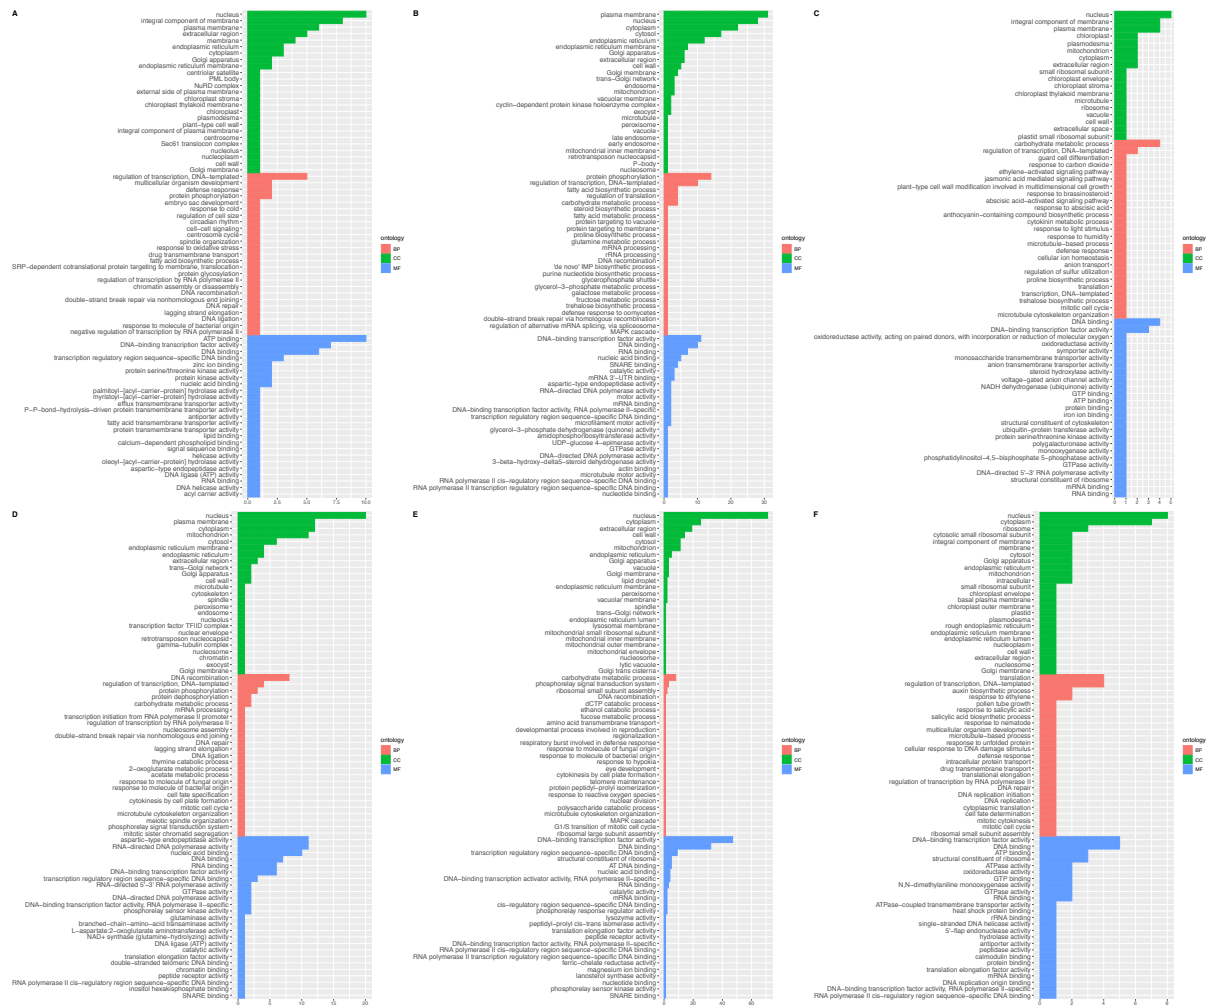

Supplementary figure 7. GO terms mapped to transcripts which are uniquely expressed in *B. conchifolia* tissues (A: female flower, B: male flower, C: leaf, D: petiole, E: root, F: vegetative bud).

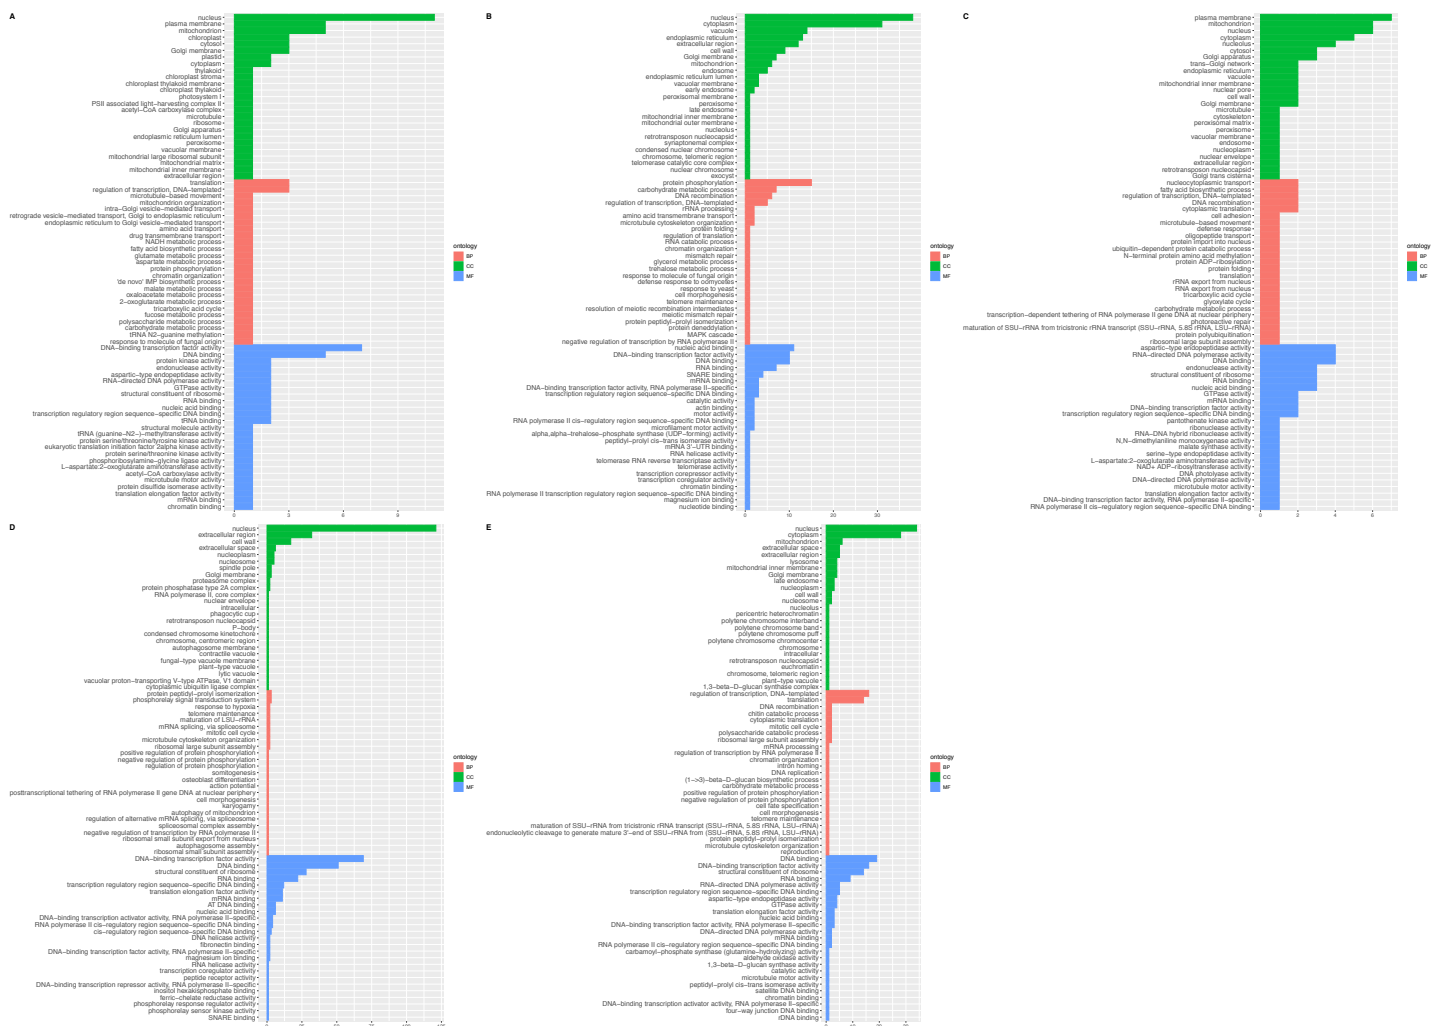

Supplementary figure 8. GO terms mapped to transcripts which are uniquely expressed in *B. plebeja* tissues (A: female flower, B: male flower, C: leaf, D: root, E: vegetative bud).

|                    | <i>B. conchifolia</i><br>before BlobTools | <i>B. plebeja</i> before<br>BlobTools | <i>B. conchifolia</i><br>after BlobTools | <i>B. plebeja</i> after<br>BlobTools |
|--------------------|-------------------------------------------|---------------------------------------|------------------------------------------|--------------------------------------|
| Female<br>flower 1 | 9,891,456                                 | 10,032,200                            | 6,854,350                                | 6,286,106                            |
| Female<br>flower2  | 10,617,146                                | 7,385,354                             | 7,112,514                                | 4,571,012                            |
| Female<br>flower3  | 8,015,202                                 | 8,117,202                             | 5,077,862                                | 4,838,732                            |
| Leaf1              | 8,870,430                                 | 9,471,050                             | 5,703,088                                | 6,129,172                            |
| Leaf2              | 6,686,284                                 | 8,521,928                             | 4,577,202                                | 5,609,244                            |
| Leaf3              | 7,693,508                                 | 9,725,984                             | 5,074,194                                | 6,555,628                            |
| Male<br>flower1    | 11,531,146                                | 10,118,246                            | 6,847,048                                | 5,634,006                            |
| Male<br>flower2    | 9,836,190                                 | 12,980,896                            | 5,615,906                                | 7,475,420                            |
| Male<br>flower3    | 67,859,634                                | 10,572,966                            | 39,271,692                               | 6,197,852                            |
| Petiole1           | 8,946,782                                 | 9,234,410                             | 5,831,818                                | 5,385,578                            |
| Petiole2           | 8,969,440                                 | 11,087,144                            | 6,035,118                                | 6,414,900                            |
| Petiole3           | 6,945,578                                 | NA                                    | 4,432,814                                | NA                                   |
| Root1              | 9,038,560                                 | 7,321,210                             | 5,936,038                                | 4,050,034                            |
| Root2              | NA                                        | 6,465,758                             | NA                                       | 3,572,410                            |
| Root3              | 10,652,432                                | 7,863,298                             | 7,337,244                                | 3,840,676                            |
| Veg bud1           | 11,837,738                                | 9,424,268                             | 8,132,896                                | 5,008,742                            |
| Veg bud2           | 13,109,894                                | 8,899,078                             | 9,035,192                                | 5,153,244                            |
| Veg bud3           | 7,551,984                                 | 8,596,202                             | 5,110,282                                | 4,598,370                            |
| Total              | 218,053,404                               | 155,817,194                           | 137,985,258                              | 91,321,126                           |

Supplementary table 1. Read counts before and after contaminant removal for *B. conchifolia* and *B. plebeja*. NA values indicate libraries that had to be discarded due to technical issues.

| Species               | Sequence ID              | % Identity | E value   | Sequence length |
|-----------------------|--------------------------|------------|-----------|-----------------|
| <i>B. conchifolia</i> | TRINITY_DN7494_c0_g1_i13 | 86.5       | 0.0       | 1544            |
| <i>B. conchifolia</i> | TRINITY_DN7494_c0_g5_i1  | 86.010     | 0.0       | 1867            |
| <i>B. conchifolia</i> | TRINITY_DN7494_c0_g2_i3  | 79.717     | 0.0       | 1777            |
| <i>B. conchifolia</i> | TRINITY_DN7494_c0_g4_i1  | 70.815     | 3.08e-122 | 753             |
| <i>B. conchifolia</i> | TRINITY_DN7494_c0_g3_i1  | 79.200     | 3.11e-67  | 381             |
| <i>B. plebeja</i>     | TRINITY_DN9097_c0_g2_i1  | 87.500     | 0.0       | 1252            |
| <i>B. plebeja</i>     | TRINITY_DN4929_c0_g4_i3  | 76.166     | 0.0       | 2406            |
| <i>B. plebeja</i>     | TRINITY_DN8128_c0_g1_i1  | 85.878     | 7.73e-165 | 1027            |
| <i>B. plebeja</i>     | TRINITY_DN4929_c0_g1_i2  | 90.955     | 2.01e-126 | 772             |
| <i>B. plebeja</i>     | TRINITY_DN9097_c0_g1_i2  | 81.212     | 4.22e-99  | 695             |
| <i>B. plebeja</i>     | TRINITY_DN4929_c0_g5_i2  | 87.387     | 3.84e-61  | 332             |
| <i>B. plebeja</i>     | TRINITY_DN5410_c0_g2_i4  | 69.369     | 1.07e-52  | 458             |
| <i>B. plebeja</i>     | TRINITY_DN9097_c0_g3_i1  | 88.095     | 1.47e-43  | 251             |
| <i>B. plebeja</i>     | TRINITY_DN5410_c0_g4_i1  | 71.429     | 1.42e-27  | 249             |
| <i>B. plebeja</i>     | TRINITY_DN5410_c0_g5_i1  | 71.429     | 3.76e-27  | 206             |
| <i>B. plebeja</i>     | TRINITY_DN5410_c0_g1_i3  | 70.149     | 9.84e-26  | 1944            |

Supplementary table 2. Results of tblastn searches of an *A. thaliana* copy of CHS against *B. conchifolia* and *B. plebeja*
